# Supplementary material
Source: MDPI journal article supplement (https://www.mdpi.com/2073-4395/9/3/154)
Supplement: s1 [file s1]

**Table S1.** Predicted *Puccinia striiformis* f. sp. *tritici* race 6E22A+ adult plant resistance quantitative trait loci (QTL) retained by selected Palmiet x Yr16DH70 F<sub>8</sub> recombinant inbred lines (RILs), scanned for all DNA markers across each QTL interval.

| ID Name <sup>1</sup>     | <i>QYr.ufs-2A</i> |        |                     | <i>QYr.ufs-2D</i>   |        |       | <i>QYr.ufs-5B</i> |                     |        | <i>QYr.ufs-6D</i>   |         |       |         | Predicted QTL <sup>2</sup> |
|--------------------------|-------------------|--------|---------------------|---------------------|--------|-------|-------------------|---------------------|--------|---------------------|---------|-------|---------|----------------------------|
|                          | WMC407            | WMC177 | GWM636 <sup>3</sup> | WMC245 <sup>3</sup> | GWM539 | WMC18 | GWM371            | GWM335 <sup>3</sup> | BARC74 | GWM325 <sup>3</sup> | BARC175 | CFD47 | BARC202 |                            |
| Palmiet#1                | 131               | 190    | 80                  | 147                 | 136    | 245   | 182               | 218                 | 177    | 143                 | 223     | 176   | 308     | 4B                         |
| Palmiet#2                | 131               | 190    | 80                  | 147                 | 136    | 245   | 182               | 218                 | 177    | 143                 | 223     | 176   | 308     |                            |
| Yr16DH70#1               | 135               | 192    | 108                 | 149                 | 134    | 221   | 186               | 210                 | 180    | 141                 | 226     | 191   | 304     | 2A+2D+5B+6D                |
| Yr16DH70#2               | 135               | 192    | 108                 | 149                 | 134    | 221   | 186               | 210                 | 180    | 141                 | 226     | 191   | 304     |                            |
| RIL 20#1_F <sub>8</sub>  | 135               | 192    | 108                 | 149                 | 134    | 221   | 186               | 210                 | 180    | 141                 | 226     | 191   | 304     | 2A+2D+5B+6D                |
| RIL 20#2_F <sub>8</sub>  | 135               | 192    | 108                 | 149                 | 134    | 221   | 186               | 210                 | 180    | 141                 | 226     | 191   | 304     |                            |
| RIL 148#1_F <sub>8</sub> | 135               | 192    | 108                 | 149                 | 134    | 221   | 186               | 210                 | 180    | 141                 | 226     | 191   | 304     | 2A+2D+5B+6D                |
| RIL 148#2_F <sub>8</sub> | N/A               | N/A    | 108                 | 149                 | N/A    | N/A   | 186               | 210                 | 180    | 141                 | 226     | 191   | 304     |                            |
| RIL 39#1_F <sub>8</sub>  | 135               | 190    | 108                 | 149                 | 134    | 221   | 186               | 210                 | 180    | 143                 | 223     | 176   | 308     | 2A+2D+5B                   |
| RIL 39#2_F <sub>8</sub>  | 135               | 190    | 108                 | 149                 | 134    | 221   | 186               | 210                 | 180    | 143                 | 223     | 176   | 308     |                            |
| RIL 34#1_F <sub>8</sub>  | 135               | 192    | 108                 | 149                 | 134    | 221   | 182               | 218                 | 177    | 141                 | 226     | 191   | 304     | 2A+2D+6D                   |
| RIL 34#2_F <sub>8</sub>  | 135               | 192    | 108                 | 149                 | 134    | 221   | 182               | 218                 | 177    | 141                 | N/A     | 191   | 304     |                            |
| RIL 142#1_F <sub>8</sub> | 135               | 192    | 108                 | 149                 | 134    | 221   | 182               | 218                 | 177    | 141                 | 226     | 191   | 304     | 2A+2D+6D                   |
| RIL 142#2_F <sub>8</sub> | 135               | 192    | 108                 | 149                 | 134    | 221   | 182               | 218                 | 177    | 141                 | 226     | 191   | 304     |                            |
| RIL 33#1_F <sub>8</sub>  | 135               | 192    | 108                 | 147                 | 136    | 245   | 186               | 210                 | 180    | 141                 | 226     | 191   | 304     | 2A+5B+6D                   |
| RIL 33#2_F <sub>8</sub>  | 135               | 192    | 108                 | 147                 | 136    | 245   | 186               | 210                 | 180    | 141                 | 226     | 191   | 304     |                            |
| RIL 10#1_F <sub>8</sub>  | 135               | 192    | 108                 | 149                 | 134    | 221   | 182               | 218                 | 177    | 143                 | 223     | 176   | 308     | 2A+2D                      |
| RIL 10#2_F <sub>8</sub>  | 135               | 192    | 108                 | 149                 | 134    | 221   | 182               | 218                 | 177    | 143                 | 223     | 176   | 308     |                            |
| RIL 144#1_F <sub>8</sub> | 135               | 192    | 108                 | 147                 | 136    | 245   | 182               | 218                 | 177    | 141                 | 226     | 191   | 304     | 2A+6D                      |
| RIL 144#2_F <sub>8</sub> | 135               | 192    | 108                 | 147                 | 136    | 245   | 182               | 218                 | 177    | 141                 | 226     | 191   | 304     |                            |
| RIL 153#1_F <sub>8</sub> | 131               | 192    | 80                  | 149                 | 134    | 221   | 186               | 210                 | 180    | 143                 | 223     | 176   | 308     | 2D+5B                      |
| RIL 153#2_F <sub>8</sub> | 131               | 192    | 80                  | 149                 | 134    | 221   | 186               | 210                 | 180    | 143                 | 223     | 176   | 308     |                            |
| RIL 17#1_F <sub>8</sub>  | 131               | 192    | 80                  | 149                 | 134    | 221   | 182               | 218                 | 177    | 141                 | 226     | 191   | 304     | 2D+6D                      |
| RIL 17#2_F <sub>8</sub>  | 131               | 192    | 80                  | 149                 | 134    | 221   | 182               | 218                 | 177    | 141                 | 226     | 191   | 304     |                            |
| RIL 45#1_F <sub>8</sub>  | 131               | 190    | 80                  | 147                 | 136    | 245   | N/A               | 210                 | 180    | 141                 | 226     | 191   | 304     | 5B+6D                      |
| RIL 45#2_F <sub>8</sub>  | 131               | 190    | 80                  | 147                 | 136    | 245   | N/A               | 210                 | 180    | 141                 | 226     | 191   | 304     |                            |
| RIL 112#1_F <sub>8</sub> | 135               | 192    | 108                 | 147                 | 136    | 245   | 182               | 218                 | 177    | 143                 | 223     | 176   | 308     | 2A                         |
| RIL 112#2_F <sub>8</sub> | 135               | 192    | 108                 | 147                 | 136    | 245   | 182               | 218                 | 177    | 143                 | 223     | 176   | 308     |                            |

**Table S1.** (continued) Predicted *Puccinia striiformis* f. sp. *tritici* race 6E22A+ adult plant resistance QTL retained by selected Palmiet x Yr16DH70 F<sub>8</sub> RILs, scanned for all DNA markers across each QTL interval.

|                          |     |     |     |     |     |     |     |     |     |     |     |     |     |      |
|--------------------------|-----|-----|-----|-----|-----|-----|-----|-----|-----|-----|-----|-----|-----|------|
| RIL 178#1_F <sub>8</sub> | 135 | 192 | 108 | 147 | 136 | 245 | 182 | 218 | 177 | 143 | 223 | 176 | 308 |      |
| RIL 178#2_F <sub>8</sub> | 135 | 192 | 108 | 147 | 136 | 245 | 182 | 218 | 177 | 143 | 223 | 176 | 308 | 2A   |
| RIL 15#1_F <sub>8</sub>  | 131 | 190 | 80  | 149 | 134 | 221 | 182 | 218 | 177 | 143 | 223 | 176 | 308 |      |
| RIL 15#2_F <sub>8</sub>  | N/A | 2D   |
| RIL 190#1_F <sub>8</sub> | 131 | 190 | 80  | 149 | 134 | 221 | 186 | 218 | 177 | 143 | 223 | 176 | 308 |      |
| RIL 190#2_F <sub>8</sub> | 131 | 190 | 80  | 149 | 134 | 221 | N/A | N/A | 177 | 143 | 223 | 176 | N/A | 2D   |
| RIL 31#1_F <sub>8</sub>  | 131 | 190 | 80  | 147 | 136 | 245 | N/A | 210 | 180 | 143 | 223 | 176 | 308 |      |
| RIL 31#2_F <sub>8</sub>  | 131 | 190 | 80  | 147 | 136 | 245 | N/A | 210 | 180 | 143 | 223 | 176 | 308 | 5B   |
| RIL 149#1_F <sub>8</sub> | 131 | 190 | 80  | 147 | 134 | 245 | 182 | 218 | 177 | 141 | 226 | 191 | 304 |      |
| RIL 149#2_F <sub>8</sub> | 131 | 190 | 80  | 147 | 134 | 245 | 182 | 218 | 177 | 141 | 226 | 191 | 304 | 6D   |
| RIL 52#1_F <sub>8</sub>  | 131 | 192 | 80  | 147 | 136 | 245 | 182 | 218 | 177 | 143 | 223 | 176 | 308 |      |
| RIL 52#2_F <sub>8</sub>  | 131 | 192 | 80  | 147 | 136 | 245 | 182 | 218 | 177 | 143 | 223 | 176 | 308 | None |

<sup>1</sup>Two plants tested per RIL/cultivar, i.e. #1 and #2.

<sup>2</sup>4B = *QYr.ufs-4B* (from Palmiet). 2A = *QYr.ufs-2A*, 2D = *QYr.ufs-2D*, 5B = *QYr.ufs-5B* and 6D = *QYr.ufs-6D* (from Yr16DH70).

<sup>3</sup>Markers GWM636, WMC245, GWM335 and GWM325 are closest to the respective QTLs.

Highlighted = Yr16DH70 marker allele detected.

N/A = no amplification.
