# Supplementary material
Source: MDPI journal article supplement (https://www.mdpi.com/2073-4395/9/3/154)
Supplement: s1 [file s1]

**Table S2.** Nucleotide sequence, annealing temperature and amplification efficiency for primer pairs used during quantitative reverse transcription polymerase chain reaction (RT-qPCR).

| Gene symbol                                  | Accession nr<br>(NCBI) <sup>1</sup> | Primer sequence (5'-3')                                | Amplicon size<br>(base pairs) | Annealing temp<br>(°C) | RT-qPCR efficiency<br>(%) |
|----------------------------------------------|-------------------------------------|--------------------------------------------------------|-------------------------------|------------------------|---------------------------|
| <i>18S</i> <sup>2</sup>                      | AH001810.2                          | F: GTGACGGGTGACGGAGAATT<br>R: GACACTAATGCGCCCGGTAT     | 151                           | 60                     | 109                       |
| <i>Pst</i> $\beta$ - <i>TUB</i> <sup>3</sup> | EF570842.1                          | F: CTCGGACGAAACCTTCTGTATC<br>R: CGTAGGTAGGTGTAGCCAATTT | 83                            | 60                     | 98.5                      |

<sup>1</sup>NCBI = National Centre for Biotechnology Information [48].

<sup>2</sup>*18S* = *18S ribosomal RNA* [49].

<sup>3</sup>*Pst*  $\beta$ -*TUB* = *Puccinia striiformis* f. sp. *tritici*  $\beta$ -tubulin.

## References

48. National Centre for Biotechnology Information. Available online: <http://www.ncbi.nlm.nih.gov/> (accessed on 7 December 2018).
49. Jarošová, J.; Kundu, J.K. Validation of reference genes as internal control for studying viral infections in cereals by quantitative real-time RT-PCR. *BMC Plant Biol.* **2010**, *10*, 146, doi:10.1186/1471-2229-10-146.
